# Supplementary material for: Isolation and Characterization of Gramineae and Fabaceae Soda Lignins
Source: PubMed Central journal article supplement (PMC5343863; doi:10.3390/ijms18020327), 2017-02-04
Supplement: ijms-18-00327-s001.pdf [file ijms-18-00327-s001.pdf]

# Supplementary Materials: Isolation and Characterization of *Gramineae* and *Fabaceae* Soda Lignins

Juan Domínguez-Robles, Rafael Sánchez, Eduardo Espinosa, Davide Savy, Pierluigi Mazzei, Alessandro Piccolo and Alejandro Rodríguez

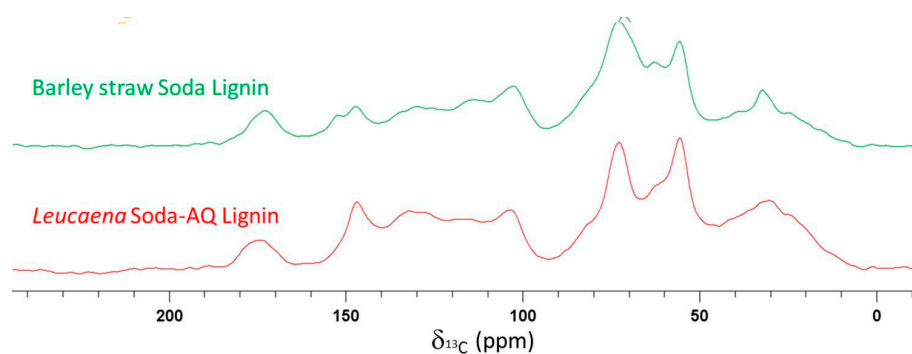

**Figure S1.**  $^{13}\text{C}$ -CPMAS solid-state NMR spectra of lignin samples from barley straw and *Leucaena leucocephala* lignin extracts.

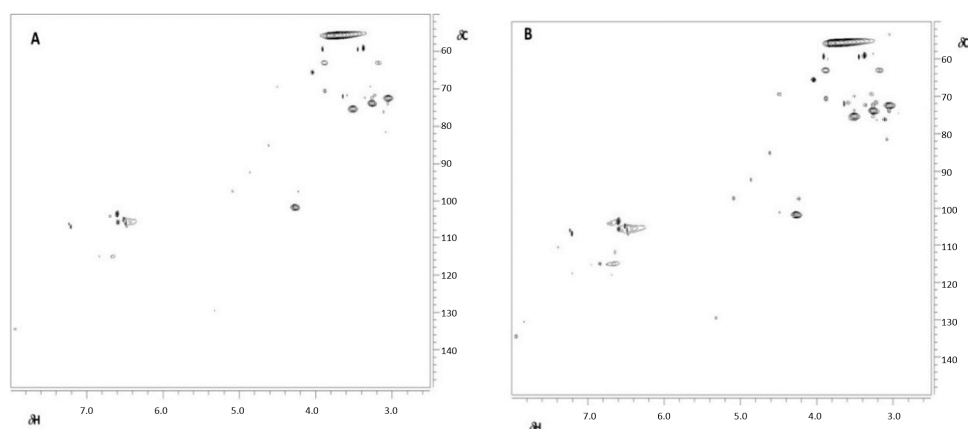

**Figure S2.**  $^{13}\text{C}$ - $^1\text{H}$  2D-HSQC NMR spectra of lignins isolated from barley straw (A) and *Leucaena leucocephala* (B).

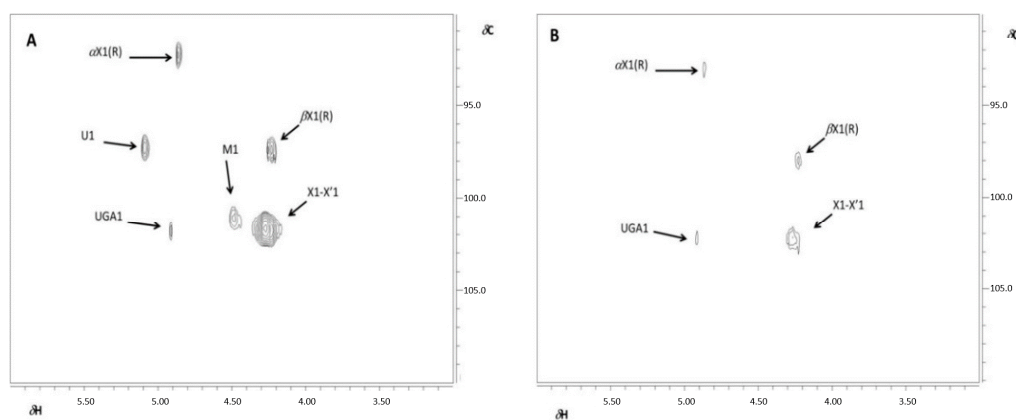

**Figure S3.** Anomeric part of the HSQC spectra of lignins isolated from *Chamaecytisus proliferus* (A) and wheat straw (B), respectively. The anomeric parts of the HSQC spectra of lignins isolated from *Leucaena leucocephala* and barley straw are the same as those presented for *Chamaecytisus proliferus*.
